# Supplementary material for: Over-Mutated Mitochondrial, Lysosomal and TFEB-Regulated Genes in Parkinson’s Disease
Source: MDPI journal article supplement (doi:10.3390/jcm11061749), 2022-03-21
Supplement: s1 [file s1]

**Supplementary Table S2.** Clinical and genetic characteristics of the age-matched healthy controls included in this study.

|           | Genetics           |            |          |                   |                             |                             |                                 |                                                  |
|-----------|--------------------|------------|----------|-------------------|-----------------------------|-----------------------------|---------------------------------|--------------------------------------------------|
| Number    | Gene               | Gene group | Heredity | Nucleotide change | Predicted effect on protein | ACMG classification/Varsome | HGMD classification             | Reference                                        |
| <b>C1</b> | PRKN               | PD         | AR       | c.1204C>T         | p.(Arg402Cys)               | Benign                      | Dubious disease causing variant | Bertoli-Avella (2005) Mov Disord 20, 424         |
|           | SEMA3D             | TFEB       | AR       | c.335A>T          | p.(Glu112Val)               | Uncertain Significance      | Not reported                    | NR                                               |
|           | TRAP1              | Mc         |          | c.1330T>A         | p.(Tyr444Asn)               | Likely Benign               | Dubious disease causing variant | Saisawat (2014) Kidney Int 85, 1310              |
| <b>C2</b> | ATP7B              | PD         | AR       | c.4301C>T         | p.(Thr1434Met)              | Uncertain Significance      | Dubious disease causing variant | Loudianos (1999) J Med Genet 36, 833             |
|           | GALNS              | LSD · TFEB | AR       | c.1145G>A         | p.(Arg382Gln)               | Pathogenic                  | Not reported                    | NR                                               |
| <b>C3</b> | <i>No variants</i> |            |          |                   |                             |                             |                                 |                                                  |
| <b>C4</b> | <i>No variants</i> |            |          |                   |                             |                             |                                 |                                                  |
| <b>C5</b> | GBA                | LSD · TFEB | AR       | c.1093G>A         | p.(Glu365Lys)               | Benign                      | Dubious disease causing         | Eyal (1991) Hum Genet 87, 328                    |
|           | FOLR1              | TFEB       | AR       | c.610C>T          | p.(Arg204Ter)               | Pathogenic                  | Disease causing variant         | Dill (2011) Mol Genet Metab 104, 362             |
| <b>C6</b> | ATP7B              | PD         | AR       | c.3620A>G         | p.(His1207Arg)              | Benign                      | Dubious disease causing variant | Abdelghaffar (2008) J Hum Genet 53, 681          |
| <b>C7</b> | GBA                | LSD · TFEB | AR       | c.1223C>T         | p.(Thr408Met)               | Uncertain Significance      | Dubious disease causing variant | Beutler (1996) Proc Assoc Am Physicians 108, 179 |
|           | ACADS              | Mc         | AR       | c.1156C>T         | p.(Arg386Cys)               | Uncertain Significance      | Disease causing variant         | Merinero (2006) J Inherit Metab Dis 29, 685      |
| <b>C8</b> | HGSNAT             | LSD        | AR       | c.1843G>A         | p.(Ala615Thr)               | Benign                      | Disease causing variant         | Hrebicek (2006) Am J Hum Genet 79, 807           |
| <b>C9</b> | HSPA6              | TFEB       |          | c.1340G>T         | p.(Gly447Val)               | NR                          | Disease causing variant         | Kause (2019) Birth Defects Res 111, 591          |

|            |        |            |        |                  |                      |                        |                                 |                                                  |
|------------|--------|------------|--------|------------------|----------------------|------------------------|---------------------------------|--------------------------------------------------|
| <b>C10</b> | GBA    | LSD · TFEB | AR     | c.1223C>T        | p.(Thr408Met)        | Uncertain Significance | Dubious disease causing variant | Beutler (1996) Proc Assoc Am Physicians 108, 179 |
|            | GNPTAB | LSD        | AR     | c.3503_3504delTC | p.(Leu1168GlnfsTer5) | Pathogenic             | Disease causing variant         | Kudo (2006) Am J Hum Genet 78, 451               |
|            | IDUA   | LSD · TFEB | AR     | c.246C>G         | p.(His82Gln)         | Uncertain Significance | Dubious disease causing variant | Scott (2013) J Pediatr 163, 498                  |
|            | PSEN2  | TFEB       | AR     | c.554A>G         | p.(Tyr185Cys)        | Uncertain Significance | Not reported                    | NR                                               |
| <b>C11</b> | ACAD9  | Mc         | AR     | c.976G>A         | p.(Ala326Thr)        | Benign                 | Dubious disease causing variant | Ilinca (2020) Stroke 51, 1056                    |
| <b>C12</b> | MUTYH  | Mc         | AR     | c.1187G>A        | p.(Gly396Asp)        | Pathogenic             | Disease causing variant         | Al-Tassan (2002) Nat Genet 30, 227               |
|            | SCO2   | Mc         | AR;AD  | c.341G>A         | p.(Arg114His)        | Pathogenic             | Disease causing variant         | Tran-Viet (2013) Am J Hum Genet 92, 820          |
|            | CRYAB  | TFEB       | AR     | c.343delT        | p.(Ser115ProfsTer14) | Pathogenic             | Disease causing variant         | Forrest (2011) Neuromuscul Disord 21, 37         |
| <b>C13</b> | PRKN   | PD         | AR     | c.1180G>A        | p.(Asp394Asn)        | Benign                 | iv/iv functional polymorphism   | Lucking (2003) Arch Neurol 60, 1253              |
|            | ATP7B  | PD         | AR     | c.3688A>G        | p.(Ile1230Val)       | Pathogenic             | Disease causing variant         | Davies (2008) Genet Test 12, 139                 |
|            | HTRA2  | PD         | AR     | c.421G>T         | p.(Ala141Ser)        | Benign                 | iv/iv functional polymorphism   | Strauss (2005) Hum Mol Genet 14, 2099            |
|            | TRAP1  | Mc         |        | c.1406G>A        | p.(Arg469His)        | Uncertain Significance | Disease causing variant         | Saisawat (2014) Kidney Int 85, 1310              |
| <b>C14</b> | MAN2B1 | LSD · TFEB | AR     | c.844C>T         | p.(Pro282Ser)        | Likely pathogenic      | Disease causing variant         | Matlach (2018) Orphanet J Rare Dis 13, 88        |
| <b>C15</b> | SPG7   | Mc         | AD; AR | c.1529C>T        | p.(Ala510Val)        | Pathogenic             | Disease causing variant         | Brugman (2008) Neurology 71, 1500                |
|            | DLST   | Mc         | AD; AR | c.1121G>A        | p.(Gly374Glu)        | Likely pathogenic      | Disease causing variant         | Remacha (2019) Am J Hum Genet 104, 651           |
| <b>C16</b> | LIPA   | LSD · TFEB | AR     | c.894G>A         | p.(Gln298=)          | Pathogenic             | Disease causing variant         | Scott (2013) Hepatology 58, 958                  |

|            |       |            |    |            |                |                        |                                 |                                                    |
|------------|-------|------------|----|------------|----------------|------------------------|---------------------------------|----------------------------------------------------|
|            | MRPL3 | Mc         | AR | c.862T>C   | p.(Ser288Pro)  | Uncertain Significance | Dubious disease causing variant | Neubauer (2017) Eur J Hum Genet 25, 404            |
| <b>C17</b> | HEXB  | LSD · TFEB | AR | c.1250C>T  | p.(Pro417Leu)  | Pathogenic             | Disease causing variant         | Gomez-Lira (1995) Hum Genet 96, 417                |
|            | PKLR  | Mc         | AR | c.1456C>T  | p.(Arg486Trp)  | Pathogenic             | Disease causing variant         | Baroncini (1993) Proc Natl Acad Sci U S A 90, 4324 |
|            | CRYAB | TFEB       | AR | c.470G>A   | p.(Arg157His)  | Benign                 | Disease causing variant         | Inagaki (2006) Biochem Biophys Res Commun 342, 379 |
| <b>C18</b> | PRKN  | PD         | AR | c.1180G>A  | p.(Asp394Asn)  | Benign                 | iv/iv functional polymorphism   | Lucking (2003) Arch Neurol 60, 1253                |
| <b>C19</b> | GBA   | LSD · TFEB | AR | c.1342G>C  | p.(Asp448His)  | Uncertain Significance | Disease causing variant         | Eyal (1990) Gene 96, 277                           |
|            | LRRK2 | PD         | AR | c.2769G>C  | p.(Gln923His)  | Uncertain Significance | Dubious disease causing variant | Camargos (2009) Mov Disord 24, 662                 |
|            | ACADS | Mc         | AR | c.511C>T   | p.(Arg171Trp)  | Uncertain Significance | iv/iv functional polymorphism   | Gregerson (1998) Hum Mol Genet 7, 619              |
| <b>C20</b> | CSPG4 | TFEB       | AR | c.5156A>G  | p.(Gln1719Arg) | Uncertain Significance | Not reported                    | NR                                                 |
| <b>C21</b> | LAMP2 | PD         | AR | c.661G>A   | p.(Gly221Arg)  | Benign                 | Dubious disease causing variant | Mook (2013) J Med Genet 50, 614                    |
|            | ACADS | Mc         | AR | c.511C>T   | p.(Arg171Trp)  | Uncertain Significance | iv/iv functional polymorphism   | Gregerson (1998) Hum Mol Genet 7, 619              |
|            | TACC2 | TFEB       | AR | c.8188G>A  | p.(Gly2730Arg) | Benign                 | Dubious disease causing variant | Bruse (2016) Hum Genomics 10, 1                    |
| <b>C22</b> | ARSA  | LSD · TFEB | AR | c.585G>T   | p.(Trp195Cys)  | Benign                 | iv/iv functional polymorphism   | Ricketts (1996) J Affect Disord 40, 137            |
|            | LRRK2 | PD         | AR | c.6241A>G  | p.(Asn2081Asp) | Benign                 | iv/iv functional polymorphism   | Heckman (2014) Neurology 83, 2256                  |
|            | ICAM1 | TFEB       |    | c.1055C>T  | p.(Pro352Leu)  | NR                     | iv/iv functional polymorphism   | Vischer (2008) Pharmacogenet Genomics 18, 1017     |
| <b>C23</b> | CLN6  | LSD        | AR | c.486+8C>T |                | Benign                 | Dubious disease causing variant | Kousi (2012) Hum Mutat 33, 42                      |

|            |                    |            |     |                   |                      |                   |                                 |                                           |
|------------|--------------------|------------|-----|-------------------|----------------------|-------------------|---------------------------------|-------------------------------------------|
|            | HTRA2              | PD         | AR  | c.421G>T          | p.(Ala141Ser)        | Benign            | iv/iv functional polymorphism   | Strauss (2005) Hum Mol Genet 14, 2099     |
|            | LRRK2              | PD         | AR  | c.4937T>C         | p.(Met1646Thr)       | Benign            | iv/iv functional polymorphism   | Ross (2011) Lancet Neurol 10, 898         |
| <b>C24</b> | ATXN2              | PD         | AD  | c.540delG         | p.(Gln180HisfsTer26) | Likely pathogenic | Not reported                    | NR                                        |
|            | ATXN2              | PD         | AD  | c.534_538delGCAAC | p.(Gln179AlafsTer69) | Pathogenic        | Not reported                    | NR                                        |
|            | ATP7B              | PD         | AR  | c.3889G>A         | p.(Val1297Ile)       | Benign            | Dubious disease causing variant | Li (2011) BMC Med Genet 12, 6             |
|            | GALNS              | LSD · TFEB | AR  | c.517T>G          | p.(Phe173Val)        | Pathogenic        | Not reported                    | NR                                        |
|            | MPO                | L          | AR  | c.752T>C          | p.(Met251Thr)        | Likely pathogenic | Dubious disease causing variant | Romano (1997) Blood 90, 4126              |
|            | MUTYH              | Mc         | AR  | c.1187G>A         | p.(Gly396Asp)        | Pathogenic        | Disease causing variant         | Al-Tassan (2002) Nat Genet 30, 227        |
| <b>C25</b> | <i>No variants</i> |            |     |                   |                      |                   |                                 |                                           |
| <b>C26</b> | HPS5               | L          | AR  | c.3293C>T         | p.(Thr1098Ile)       | Benign            | Dubious disease causing variant | Huizing (2004) Traffic 5, 711             |
|            | HOGA1              | Mc         | Ar  | c.700+5G>T        |                      | Pathogenic        | Disease causing variant         | Belostotsky (2010) Am J Hum Genet 87, 392 |
| <b>C27</b> | PRKN               | PD         | AR  | c.1180G>A         | p.(Asp394Asn)        | Benign            | iv/iv functional polymorphism   | Lucking (2003) Arch Neurol 60, 1253       |
|            | GLA                | LSD · TFEB | XLR | c.937G>T          | p.(Asp313Tyr)        | Pathogenic        | Dubious disease causing variant | Eng (1993) Am J Hum Genet 53, 1186        |
|            | GLDC               | Mc         | AR  | c.1705G>A         | p.(Ala569Thr)        | Benign            | Disease causing variant         | Kure (2006) Hum Mutat 27, 343             |
| <b>C28</b> | ATP7B              | PD         | AR  | c.4135C>T         | p.(Pro1379Ser)       | Pathogenic        | Disease causing variant         | Cox (2005) Hum Mutat 26, 280              |
|            | ARSA               | LSD · TFEB | AR  | c.869G>A          | p.(Arg290His)        | Pathogenic        | Disease causing variant         | Gort (1999) Hum Mutat 14, 240             |
|            | SPINK1             | TFEB       | AR  | c.163C>T          | p.(Pro55Ser)         | Benign            | Dubious disease causing variant | Chen (2001) Gastroenterology 120, 1061    |

|            |        |            |    |           |                |                        |                                 |                                                  |
|------------|--------|------------|----|-----------|----------------|------------------------|---------------------------------|--------------------------------------------------|
| <b>C29</b> | PRKN   | PD         | AR | c.574A>C  | p.(Met192Leu)  | Benign                 | Dubious disease causing variant | Hedrich (2002) Neurology 58, 1239                |
|            | HGSNAT | LSD        | AR | c.1880A>G | p.(Tyr627Cys)  | Uncertain Significance | Disease causing variant         | Ouesleti (2011) Clin Chim Acta 412, 2326         |
|            | IDUA   | LSD · TFEB | AR | c.246C>G  | p.(His82Gln)   | Uncertain Significance | Dubious disease causing variant | Scott (2013) J Pediatr 163, 498                  |
| <b>C30</b> | GBA    | LSD · TFEB | AR | c.1223C>T | p.(Thr408Met)  | Uncertain Significance | Dubious disease causing variant | Beutler (1996) Proc Assoc Am Physicians 108, 179 |
|            | ATP7B  | PD         | AR | c.3620A>G | p.(His1207Arg) | Benign                 | Dubious disease causing variant | Abdelghaffar (2008) J Hum Genet 53, 681          |
|            | FAM83G | TFEB       | AR | c.1888C>T | p.(Arg630Trp)  | Likely Benign          | iv/iv functional polymorphism   | Loomis (2019) Sci Rep 9, 5942                    |
|            | TGM5   | TFEB       | AR | c.337G>T  | p.(Gly113Cys)  | Pathogenic             | Disease causing variant         | Cassidy (2005) Am J Hum Genet 77, 909            |

All the variants were found in heterozygosity. PD: Parkinson disease; Mc: Mitochondrial function; L: Lysosomal; LSD: Lysosomal storage disease; AR: Autosomal recessive; AD: Autosomal dominant; NR: Non reported.
