# Supplementary material for: Over-Mutated Mitochondrial, Lysosomal and TFEB-Regulated Genes in Parkinson’s Disease
Source: MDPI journal article supplement (doi:10.3390/jcm11061749), 2022-03-21
Supplement: s1 [file s1]

**Supplementary Table S1.** Clinical and genetic characteristics of PD patients included in this study.

| Patient |              |                    | Clinical traits |    |    |            |     |           |                          | Genetics |            |          |                   |                             |                              |                                                 |                 |                                             |                        |                                 |
|---------|--------------|--------------------|-----------------|----|----|------------|-----|-----------|--------------------------|----------|------------|----------|-------------------|-----------------------------|------------------------------|-------------------------------------------------|-----------------|---------------------------------------------|------------------------|---------------------------------|
| #       | Age of onset | Age                | FH              | PH | MF | Dyskinesia | NMS | DaT-SPECT | Diagnosis                | Gene     | Gene group | Heredity | Nucleotide change | Predicted effect on protein | ACMG classification /Varsome | HGMD classification                             | Overrepresented | Reference                                   |                        |                                 |
| 1       | 48y          | 58y                | x               | x  |    |            |     | Altered   |                          | ATP7B    | PD         | AR       | c.3620A>G         | p.(His1207Arg)              | Benign                       | Dubious disease causing variant<br>Not reported | Yes             | Abdelghaffar (2008) J Hum Genet 53, 681     |                        |                                 |
|         |              |                    |                 |    |    |            |     |           |                          | FAM83G   | TFEB       |          | c.968C>T          | p.(Pro323Leu)               | Uncertain Significance       |                                                 |                 |                                             |                        |                                 |
| 2       | 72y          | 79y                |                 | x  |    |            |     |           |                          | GIGYF2   | PD         | AD       | c.3167C>G         | p.(Ser1056Cys)              | Uncertain Significance       | Not reported                                    | No              | NR                                          |                        |                                 |
|         |              |                    |                 |    |    |            |     |           |                          | ACADS    | Mc         |          | AR                | c.511C>T                    | p.(Arg171Trp)                |                                                 |                 |                                             | Uncertain Significance | iv/iv functional polymorphism   |
| 3       | 35y          | 46y                | x               |    | x  |            | x   | Altered   | Mixed parkinson          | PRKN     | PD         | AR       | c.635G>A          | p.(Cys212Tyr)               | Likely Pathogenic            | Disease causing variants                        | Yes             | Pineda-Trujillo (2001) Neurosci Lett 2, 298 |                        |                                 |
|         |              |                    |                 |    |    |            |     |           |                          | PRKN     | PD         |          | AR                | c.155delA                   | p.(Asn52Metfs Ter29)         |                                                 |                 |                                             | Pathogenic             | Disease causing variants        |
| 4       | 35y          | 66y (Age of death) |                 |    | x  | x          |     |           | Akinetic/rigid parkinson | GIGYF2   | PD         | AD       | c.658C>T          | p.(Arg220Cys)               | Uncertain Significance       | Not reported                                    | Yes             | NR                                          |                        |                                 |
|         |              |                    |                 |    |    |            |     |           |                          | GNPTAB   | LSD        |          | AR                | c.3503_3504delTC            | p.(Leu1168GlnfsTer5)         |                                                 |                 |                                             | Pathogenic             | Disease causing variants        |
|         |              |                    |                 |    |    |            |     |           |                          | UNC13D   | L · TFEB   |          | AR                | c.1820G>C                   | p.(Arg607Pro)                |                                                 |                 |                                             | Likely Pathogenic      | Disease causing variants        |
|         |              |                    |                 |    |    |            |     |           |                          | CRY1     | TFEB       |          | AD                | c.1657+3A>C                 |                              |                                                 |                 |                                             | Benign                 | Disease causing variants        |
|         |              |                    |                 |    |    |            |     |           |                          | CSPG4    | TFEB       |          |                   | c.3097G>A                   | p.(Gly1033Arg)               |                                                 |                 |                                             | Uncertain Significance | Not reported                    |
| 5       | 77y          | 83y                | x               | x  |    |            | x   |           | Mixed parkinson          | GAA      | LSD · TFEB | AR       | c.-32-13T>G       |                             | Pathogenic                   | Disease causing variants                        | No              | Huie (1994) Hum Mol Genet 3, 2231           |                        |                                 |
|         |              |                    |                 |    |    |            |     |           |                          | PSEN2    | TFEB       |          | AD                | c.389C>T                    | p.(Ser130Leu)                |                                                 |                 |                                             | Benign                 | Dubious disease causing variant |
| 6       | 72y          | 86y (Age of death) |                 |    |    |            | x   | Altered   | Akinetic/rigid parkinson | GNPTAB   | LSD        | AR       | c.1433T>C         | p.(Ile478Thr)               | Uncertain Significance       | Dubious disease causing variant                 | Yes             | Raza (2016) Eur J Hum Genet 24, 529         |                        |                                 |
|         |              |                    |                 |    |    |            |     |           |                          | MPO      | L · TFEB   |          | AR                | c.1705C>T                   | p.(Arg569Trp)                |                                                 |                 |                                             | Pathogenic             | Disease causing variants        |
|         |              |                    |                 |    |    |            |     |           |                          | MUTYH    | Mc         |          | AR                | c.536A>G                    | p.(Tyr179Cys)                |                                                 |                 |                                             | Likely Pathogenic      | Disease causing variants        |
|         |              |                    |                 |    |    |            |     |           |                          | OGG1     | Mc         |          | ?                 | c.923G>A                    | p.(Gly308Glu)                |                                                 |                 |                                             | Uncertain Significance | Dubious disease causing variant |
| 7       | 66y          | 81y                |                 | x  |    |            | x   |           | Mixed parkinson          | ATP7B    | PD         | AR       | c.1934T>G         | p.(Met645Arg)               | Likely Pathogenic            | Disease causing                                 | Yes             | Shah (1997) Am J Hum Genet 61, 317          |                        |                                 |

|    |     |                       |   |   |   |   |                       |                             |         |               |                     |                           |                           |                                       |                                       |                                                     |                                                       |
|----|-----|-----------------------|---|---|---|---|-----------------------|-----------------------------|---------|---------------|---------------------|---------------------------|---------------------------|---------------------------------------|---------------------------------------|-----------------------------------------------------|-------------------------------------------------------|
|    |     |                       |   |   |   |   | SEMA3D                | TFEB                        |         | c.170G>T      | p.(Ser57Ile)        | Uncertain<br>Significance | variants<br>Not reported  | <i>Not present in<br/>Gnomad</i>      | NR                                    |                                                     |                                                       |
| 8  | 54y | 68y                   | x | x |   | x | Mixed<br>parkinson    | ATXN2                       | PD      | AD            | c.542_543in<br>sACA | p.(Gln188dup)             | Uncertain<br>Significance | Not reported                          | <i>Not present in<br/>Gnomad</i>      | NR                                                  |                                                       |
|    |     |                       |   |   |   |   |                       | CTBS                        |         | L ·<br>TFEB   |                     | c.648G>T                  | p.(Trp216Cys)             | Uncertain<br>Significance             | Not reported                          | Yes                                                 | NR                                                    |
|    |     |                       |   |   |   |   |                       | TXNRD2                      |         | Mc            | AR                  | c.1341T>G                 | p.(Tyr447Ter)             | Pathogenic                            | Disease<br>causing<br>variants        | Yes                                                 | Prasad (2014) J Clin<br>Endocrinol<br>Metab 99, E1556 |
| 9  | 48y | 54y                   | x |   | x |   | x                     | Akinetic/rigid<br>parkinson | CYP27A1 | Mc            | AR                  | c.1436G>A                 | p.(Arg479His)             | Likely<br>Pathogenic                  | Not reported                          | Yes                                                 | NR                                                    |
| 10 | 76y | 80y                   | x | x |   | x | Tremoric<br>parkinson | ATP7B                       | PD      | AR            | c.4301C>T           | p.(Thr1434Met<br>)        | Uncertain<br>Significance | Dubious<br>disease<br>causing variant | Yes                                   | Loudianos (1999) J Med<br>Genet 36, 833             |                                                       |
|    |     |                       |   |   |   |   |                       | ATP7B                       | PD      | AR            | c.1301A>G           | p.(Asn434Ser)             | Uncertain<br>Significance | Not reported                          | Yes                                   | NR                                                  |                                                       |
|    |     |                       |   |   |   |   |                       | GNPTAB                      | LSD     | AR            | c.1433T>C           | p.(Ile478Thr)             | Uncertain<br>Significance | Dubious<br>disease<br>causing variant | Yes                                   | Raza (2016) Eur J Hum<br>Genet 24, 529              |                                                       |
|    |     |                       |   |   |   |   |                       | GBA                         |         | LSD ·<br>TFEB | AR                  | c.-15A>G                  |                           | Uncertain<br>Significance             | Dubious<br>disease<br>causing variant | No                                                  | Orme (2020) Acta<br>Neuropathol<br>Commun 8, 5        |
|    |     |                       |   |   |   |   |                       | HPS1                        |         | L ·<br>TFEB   | AR                  | c.1132A>G                 | p.(Ile378Val)             | Likely Benign                         | Not reported                          | <i>Not present in<br/>Gnomad</i>                    | NR                                                    |
|    |     |                       |   |   |   |   |                       | CRY1                        |         | TFEB          | AD                  | c.1657+3A><br>C           |                           | Benign                                | Disease<br>causing<br>variants        | Yes                                                 | Patke (2017)<br>Cell 169, 203                         |
| 11 | 66y | 71y                   |   | x |   |   | Mixed<br>parkinson    | ATP7B                       | PD      | AR            | c.4135C>T           | p.(Pro1379Ser)            | Pathogenic                | Disease<br>causing<br>variants        | No                                    | Cox (2005) Hum<br>Mutat 26, 280                     |                                                       |
|    |     |                       |   |   |   |   |                       | PRKN                        | PD      | AR            | c.1180G>A           | p.(Asp394Asn)             | Benign                    | iv/iv functional<br>polymorphism      | No                                    | Lucking (2003) Arch<br>Neurol 60, 1253              |                                                       |
|    |     |                       |   |   |   |   |                       | NDUFB3                      | Mc      | AR            | c.64T>C             | p.(Trp22Arg)              | Pathogenic                | Disease<br>causing<br>variants        | Yes                                   | Calvo (2012) Sci Transl<br>Med 4, 118ra10           |                                                       |
|    |     |                       |   |   |   |   |                       | COQ8B                       | Mc      | AR            | c.187C>T            | p.(Arg63Trp)              | Uncertain<br>Significance | Dubious<br>disease<br>causing variant | No                                    | Landis (2017) J<br>Cardiovasc Transl<br>Res 10, 423 |                                                       |
| 12 | 47y | 69y (Age<br>of death) |   |   | x | x | x                     | Akinetic/rigid<br>parkinson | PRKN    | PD            | AR                  | c.1310C>T                 | p.(Pro437Leu)             | Likely<br>Pathogenic                  | Disease<br>causing<br>variants        | No                                                  | Foroud (2003)<br>Neurology 60, 796                    |
|    |     |                       |   |   |   |   |                       |                             | SYNJ1   | PD            | AR                  | c.4033G>A                 | p.(Val1345Ile)            | Likely Benign                         | Dubious<br>disease<br>causing variant | Yes                                                 | Bandrés-Ciga (2016)<br>Neurobiol<br>Aging 45, 213.e3  |
|    |     |                       |   |   |   |   |                       |                             | ATXN2   | PD            | AD                  | c.2937+4A><br>C           |                           | Uncertain<br>Significance             | Not reported                          | Yes                                                 | NR                                                    |
|    |     |                       |   |   |   |   |                       |                             | CYP27A1 | Mc            | AR                  | c.1151C>T                 | p.(Pro384Leu)             | Benign                                | Dubious<br>disease<br>causing variant | No                                                  | Verrips (2000)<br>Brain 123, 908                      |
| 13 | 64y | 71y                   | x |   |   |   | Tremoric<br>parkinson | SMPD1                       |         | LSD ·<br>TFEB | AR                  | c.1550A>T                 | p.(Glu517Val)             | Likely<br>Pathogenic                  | Disease<br>causing<br>variants        | No                                                  | Simonaro (2002) Am J<br>Hum Genet 71, 1413            |
|    |     |                       |   |   |   |   |                       | ACO2                        |         | Mc            | AR                  | c.220C>G                  | p.(Leu74Val)              | VUS                                   | Disease<br>causing<br>variants        | No                                                  | Metodiev (2014) J Med<br>Genet 51, 834                |

|    |     |     |   |   |   |         |                          |                    |            |        |                |                       |                        |                                 |                                 |                                                      |                                         |
|----|-----|-----|---|---|---|---------|--------------------------|--------------------|------------|--------|----------------|-----------------------|------------------------|---------------------------------|---------------------------------|------------------------------------------------------|-----------------------------------------|
| 14 | 73y | 85y | x | x | x |         | Akinetic/rigid parkinson | GAA                | LSD · TFEB | AR     | c.271G>A       | p.(Asp91Asn)          | Benign                 | Dubious disease causing variant | No                              | Labrousse (2010) Mol Genet Metab99, 379              |                                         |
| 15 | 35y | 41y | x | x | x | altered | Mixed parkinson          | ATP13A2            | LSD · TFEB | AR     | c.238T>C       | p.(Cys80Arg)          | VUS                    | Not reported                    | Yes                             | NR                                                   |                                         |
|    |     |     |   |   |   |         |                          | GAA                | LSD · TFEB | AR     | c.271G>A       | p.(Asp91Asn)          | Benign                 | Dubious disease causing variant | No                              | Labrousse (2010) Mol Genet Metab99, 379              |                                         |
|    |     |     |   |   |   |         |                          | CTBS               | L          | ?      | c.724A>T       | p.(Ile242Phe)         | VUS                    | Not reported                    | Yes                             |                                                      |                                         |
| 16 | 42y | 55y | x | x | x |         | Mixed parkinson          | FAM83G             | TFEB       |        | c.1888C>T      | p.(Arg630Trp)         | Likely Benign          | iv/iv functional polymorphism   | No                              | Loomis (2019) Sci Rep 9, 5942                        |                                         |
| 17 | 76y | 82y | x |   |   |         | Akinetic/rigid parkinson | TMEM192            | L · TFEB   |        | c.371G>A       | p.(Arg124Gln)         | VUS                    | Not reported                    | Yes                             | NR                                                   |                                         |
|    |     |     |   |   |   |         |                          | CSPG4              | TFEB       |        | c.2702T>G      | p.(Val901Gly)         | Likely Benign          | Dubious disease causing variant | Yes                             | de Vrij (2019) Mol Psychiatry 24, 757                |                                         |
|    |     |     |   |   |   |         |                          | ABCB6              | Mc         | AD     | c.2168G>A      | p.(Arg723Gln)         | Pathogenic             | Disease causing variants        | Yes                             | Bawazir (2014) Transfusion 54, 3043                  |                                         |
| 18 | 74y | 79y | x | x |   | x       | altered                  | Tremoric parkinson | ATP7B      | PD     | AR             | c.3620A>G             | p.(His1207Arg)         | Benign                          | Dubious disease causing variant | Yes                                                  | Abdelghaffar (2008) J Hum Genet 53, 681 |
| 19 | 63y | 68y | x | x |   | x       | Akinetic/rigid parkinson | SMPD1              | LSD · TFEB | AR     | c.106G>T       | p.(Val36Leu)          | Uncertain Significance | Not reported                    | Yes                             | NR                                                   |                                         |
|    |     |     |   |   |   |         |                          | HPS1               | L · TFEB   | AR     | c.1915G>A      | p.(Gly639Ser)         | Uncertain Significance | Dubious disease causing variant | Yes                             | Stearman (2019) Am J Respir Crit Care Med epub, epub |                                         |
| 20 | 42y | 60y | x | x | x | x       |                          | ATXN2              | PD         | AD     | c.519_520delGC | p.(Gln174Alafs Ter75) | Likely Pathogenic      | Not reported                    | Yes                             | NR                                                   |                                         |
|    |     |     |   |   |   |         |                          | SMPD1              | LSD · TFEB | AR     | c.1022G>C      | p.(Arg341Pro)         | Likely Pathogenic      | Not reported                    | Yes                             | NR                                                   |                                         |
|    |     |     |   |   |   |         |                          | SEMA3D             | TFEB       |        | c.1843C>A      | p.(Pro615Thr)         | Likely Benign          | Dubious disease causing variant | No                              | Jiang (2012) Hum Mutat 33, 281                       |                                         |
|    |     |     |   |   |   |         |                          | SLC25A46           | Mc         | AR     | c.1018C>T      | p.(Arg340Cys)         | Pathogenic             | Disease causing variants        | Yes                             | Abrams (2015) Nat Genet 47, 926                      |                                         |
|    |     |     |   |   |   |         |                          | NDUFV1             | Mc         | AR     | c.1162+4A>C    |                       | Likely pathogenic      | Disease causing variants        | Yes                             | Benit (2001) Am J Hum Genet 68, 1344                 |                                         |
| 21 | 48y | 55y | x |   |   | altered | Mixed parkinson          | PRKN               | PD         | AR     | c.1180G>A      | p.(Asp394Asn)         | Benign                 | iv/iv functional polymorphism   | No                              | Lucking (2003) Arch Neurol 60, 1253                  |                                         |
|    |     |     |   |   |   |         |                          | GBA                | LSD · TFEB | AR     | c.1300C>T      | p.(Arg434Cys)         | Likely Pathogenic      | Disease causing variants        | Yes                             | Rozenberg (2006) Blood Cells Mol Dis 37, 204         |                                         |
|    |     |     |   |   |   |         |                          | HEXA               | LSD · TFEB | AR     | c.1073+1G>T    |                       | Pathogenic             | Disease causing variants        | Yes                             | Akli (1991) Genomics 11, 124                         |                                         |
|    |     |     |   |   |   |         |                          | SQSTM1             | TFEB       | AD; AR | c.1175C>T      | p.(Pro392Leu)         | VUS                    | Disease causing variants        | Yes                             | Laurin (2002) Am J Hum Genet 70, 1582                |                                         |
|    |     |     |   |   |   |         |                          | TGM5               | TFEB       | AR     | c.337G>T       | p.(Gly113Cys)         | Likely Pathogenic      | Disease causing variants        | Yes                             | Cassidy (2005) Am J Hum Genet 77, 909                |                                         |
|    |     |     |   |   |   |         |                          | MUTYH              | Mc         | AR     | c.536A>G       | p.(Tyr179Cys)         | Likely Pathogenic      | Disease causing                 | Yes                             | Al-Tassan (2002) Nat Genet 30, 227                   |                                         |

[illegible]

[illegible]

All the variants were found in heterozygosity. FH: Family history; PH: Pathological history; FM: Motor fluctuations; NMS: Non-motor symptoms; PD: Parkinson disease; Mc: Mitochondrial function; L: Lysosomal; LSD: Lysosomal storage disease; AR: Autosomal recessive; AD: Autosomal dominant; VUS: Variant of Unknown Significance; iv/iv: In vitro/in vivo; NR: Non reported. Overrepresented when comparing the variant frequency in PD patients and the frequency in GnomAD database, and reference if it has been reported before.
